# Supplementary material for: 3-Hydroxyphenylacetic Acid: A Blood Pressure-Reducing Flavonoid Metabolite
Source: MDPI journal article supplement (doi:10.3390/nu14020328), 2022-01-13
Supplement: s1 [file s1]

# 3-hydroxyphenylacetic acid: a blood pressure-reducing flavonoid metabolite

*Patrícia Dias, Jana Pourová, Marie Vopršalová, Iveta Nejmanová  
& Přemysl Mladěnka*

Charles University, Faculty of Pharmacy, Czech Republic

## Supplementary data

4 pages

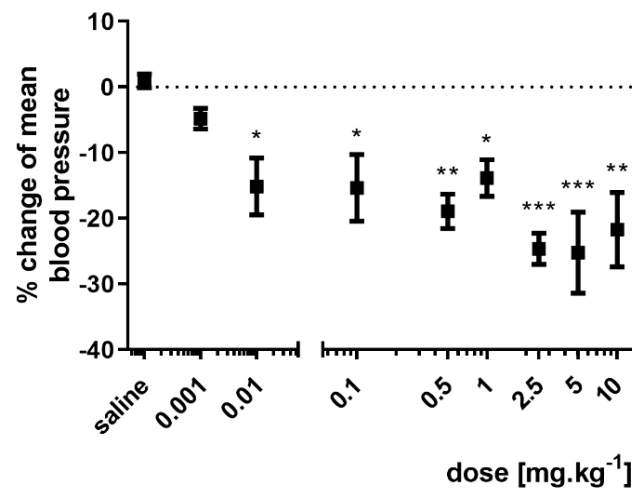

**Figure S1.** Changes in mean arterial blood pressure after *bolus* i.v. administration of 3-hydroxyphenylacetic acid. Doses ranged from 0.001 to 10 mg.kg<sup>-1</sup>. Results are expressed as per cent decrease from the initial value. Spontaneously hypertensive rats (n=8) were used. The decrease in mean blood pressure was significant from a low dose of 0.01 mg.kg<sup>-1</sup>. \* p < 0.05, \*\* p < 0.01, \*\*\* p < 0.001 *vs.* saline.

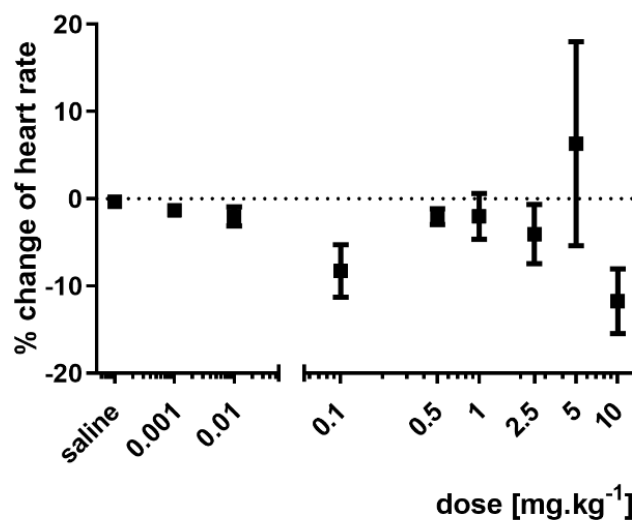

**Figure S2.** Changes in heart rate after *bolus* i.v. administration of 3-hydroxyphenylacetic acid. Doses ranged from 0.001 to 10 mg.kg<sup>-1</sup>. Results are expressed as per cent change from the initial value in spontaneously hypertensive rats (n=8). No significant differences were found.

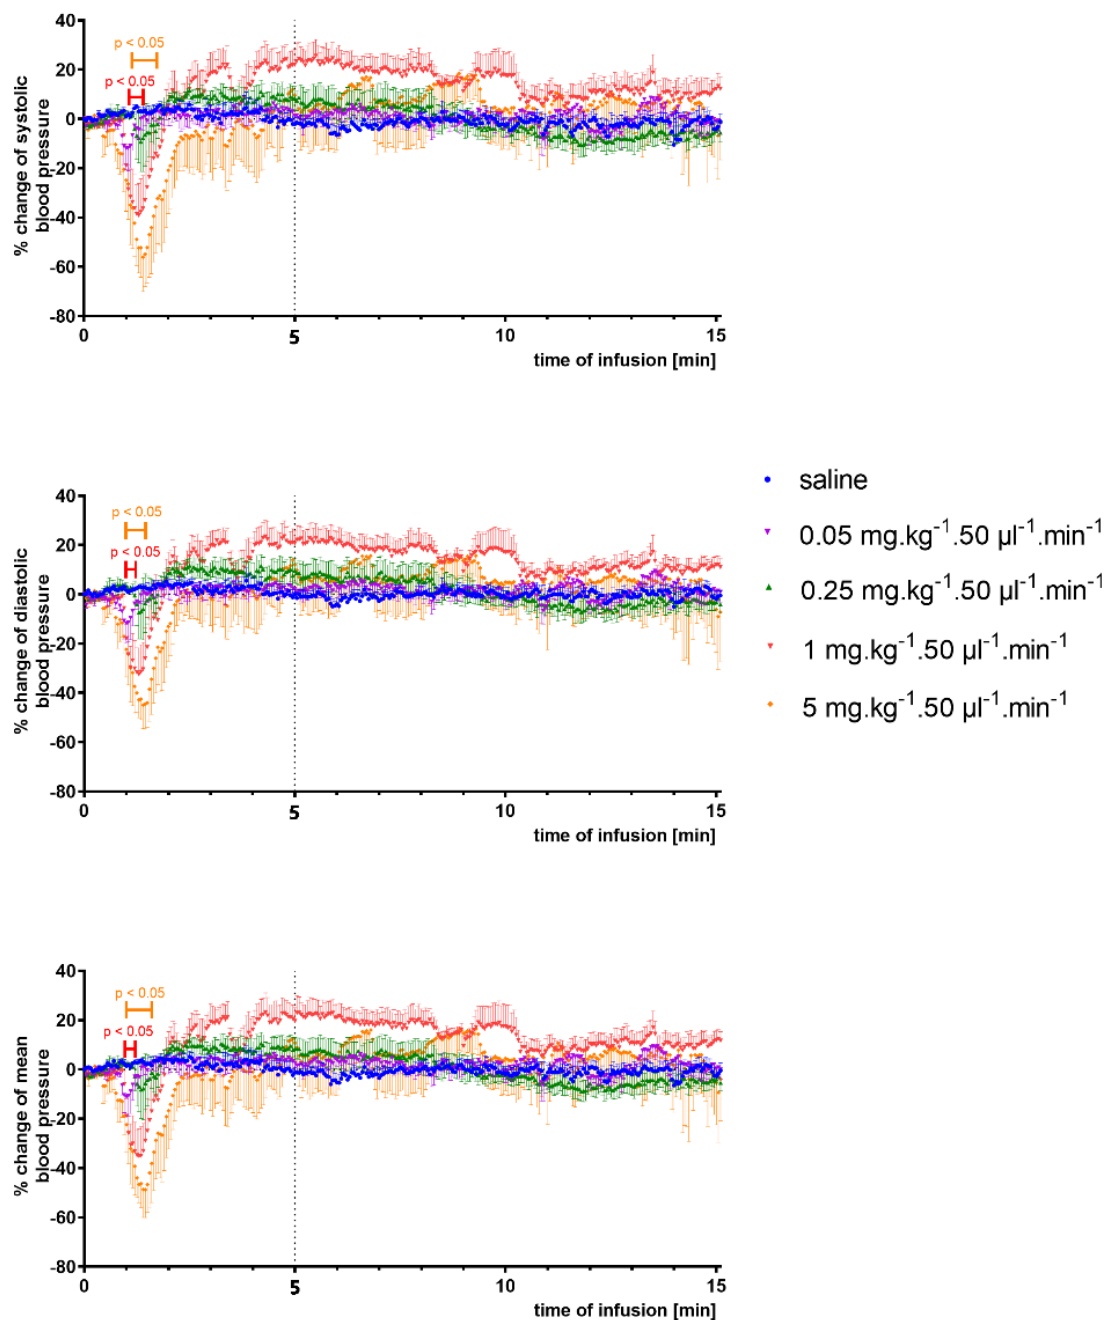

**Figure S3.** Effect of 3-hydroxyphenylacetic acid infusions (0.05, 0.25, 1 and 5 mg·kg<sup>-1</sup>·min<sup>-1</sup>) on systolic, diastolic and mean blood pressures in spontaneously hypertensive rats.

Saline was used as the solvent and hence also as the control.  $p < 0.05$  vs. saline (n=4).

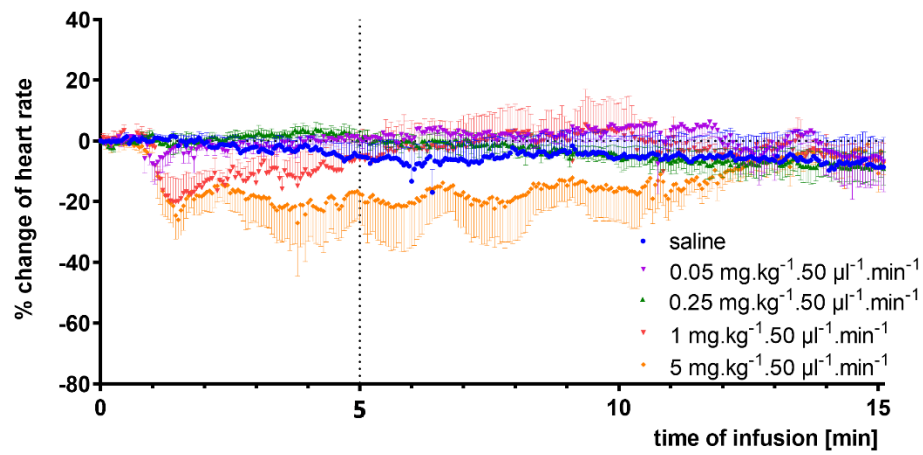

**Figure S4.** Effect of 3-hydroxyphenylacetic acid infusions (0.05, 0.25, 1 and 5 mg·kg<sup>-1</sup>·min<sup>-1</sup>) on heart rate in spontaneously hypertensive rats.

No significant differences were found (n=4).
